# Supplementary material for: Medical cannabis for severe treatment resistant epilepsy in children: a case-series of 10 patients
Source: PubMed Central journal article supplement — BMJ Paediatr Open. 2021 Dec 14;5(1):e001234. doi: 10.1136/bmjpo-2021-001234 (PMC8689159; doi:10.1136/bmjpo-2021-001234), 2021-12-14
Supplement: bmjpo-2021-001234supp001.pdf [file bmjpo-2021-001234supp001.pdf]

## Appendix A. Interview topic guide

Remind interviewees that this interview is about telling their story, that there are not right or wrong answers, and that they can withdraw from the interview at any time should they wish to or decline to answer a question at any time.

- Can you give us some background to your child's medical cannabis use?
- Can you provide us detail on the following: Age, Diagnosis, Frequency of medical cannabis use, dose of medical cannabis use, company and product of medical cannabis use?
- Can you provide us detail on seizure frequency before medical cannabis use and tell us about the effects of medical cannabis on seizure frequency?
- Could you tell us about your child's previous and current use of anti-epileptic drugs
- Present- what are you are doing now?
  
- What (if anything) has changed since using medical cannabis?
  
- What do you like most about the medical cannabis treatment you are receiving?
  
- What do you dislike most about the medical cannabis treatment you are receiving?
  
- Can you sum up your thoughts and feelings about the treatment?
  
- How do previous drugs compare to medical cannabis and/or medical cannabis and other drugs?
  
- Can you describe the patient's quality of life before and after medical cannabis treatment?
  
- Can you describe your/your family's quality of life before and after medical cannabis treatment?
  
- What do your friends and family think about your choice of treatment?
  
- Future- how do you see your child's future? What are your hopes in terms of medical cannabis treatment?
  
- What are your worries related to medical cannabis treatment?
  
- What (if anything) would you like to change about the current approach, e.g. in terms of the medications, regulations, costs, access, etc.?
  
- Do you feel well provided by your doctor? Does your doctor understand your child's needs in relation to medical cannabis?
  
- Where would you like to have/have had (more) help and support? From whom?
  
- What (if anything) has been the impact of COVID-19 on your situation?
  
- Is there anything you would like to add?

Thank you!
